# Supplementary figures and images for: NMDA spikes mediate amplification of inputs in the rat piriform cortex
Source: eLife journal article supplement (doi:10.7554/elife.38446), 2018-12-21

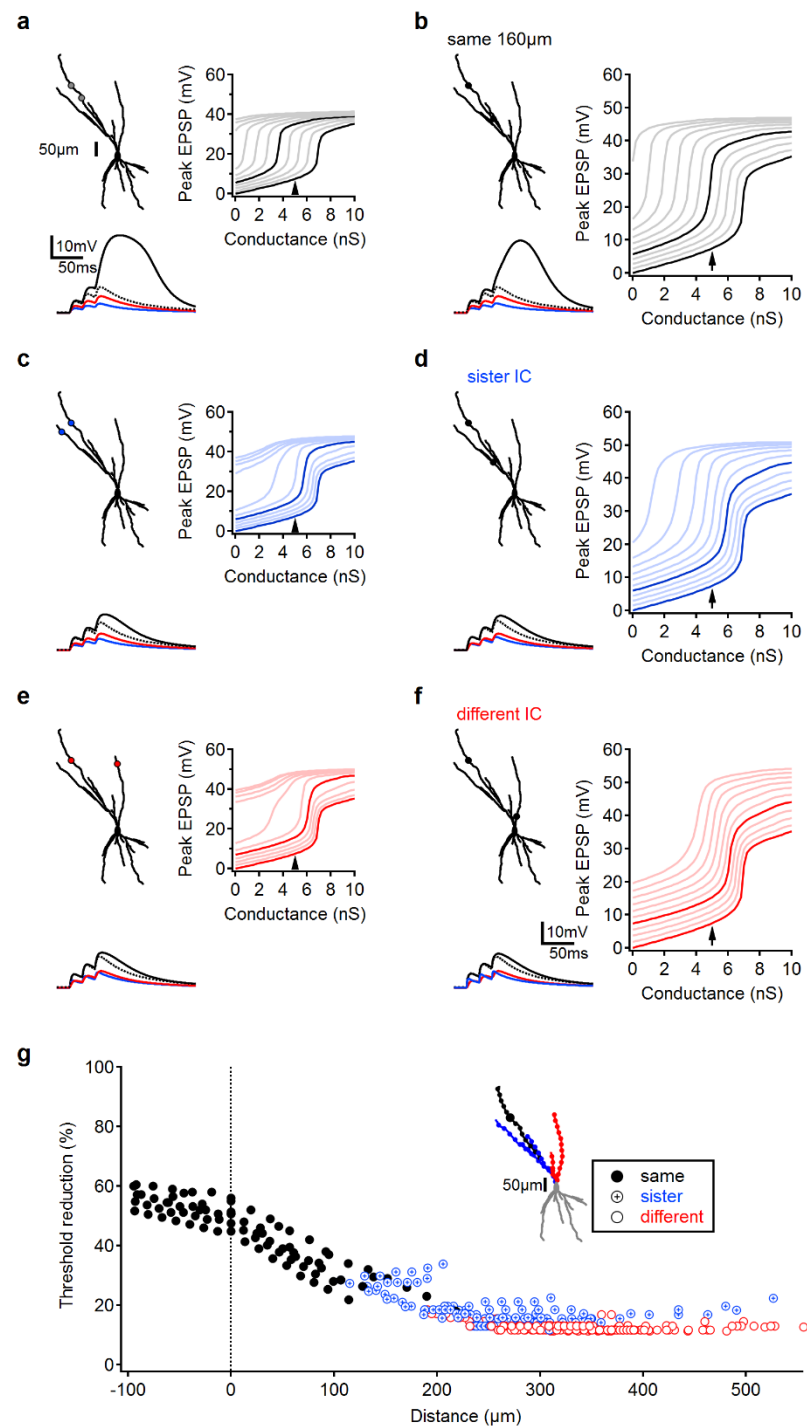

Supplement: supp [file elife-38446-supp-v1.zip]

a

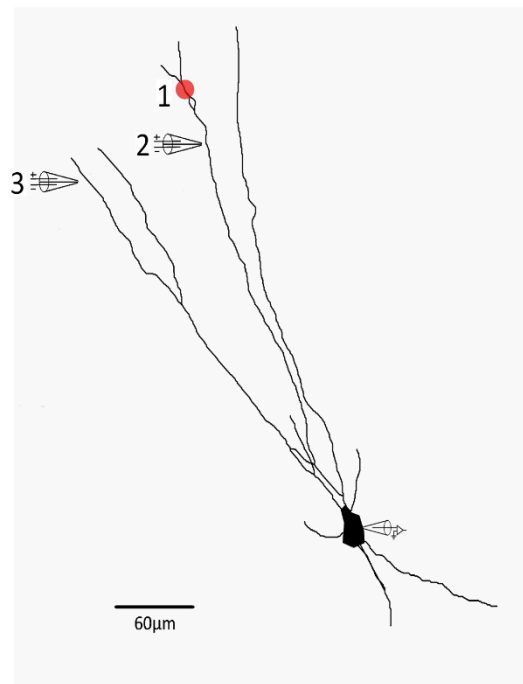

b

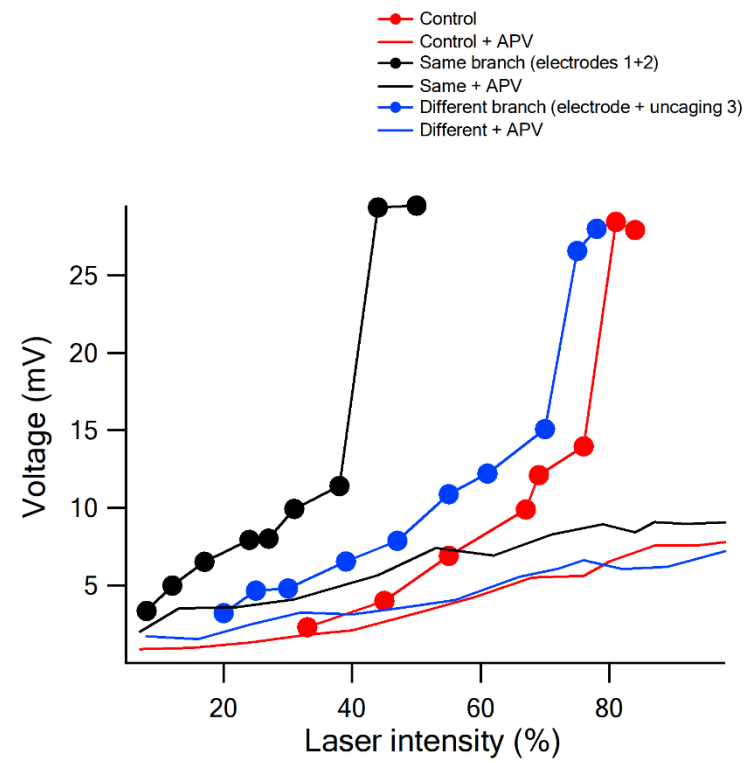

d

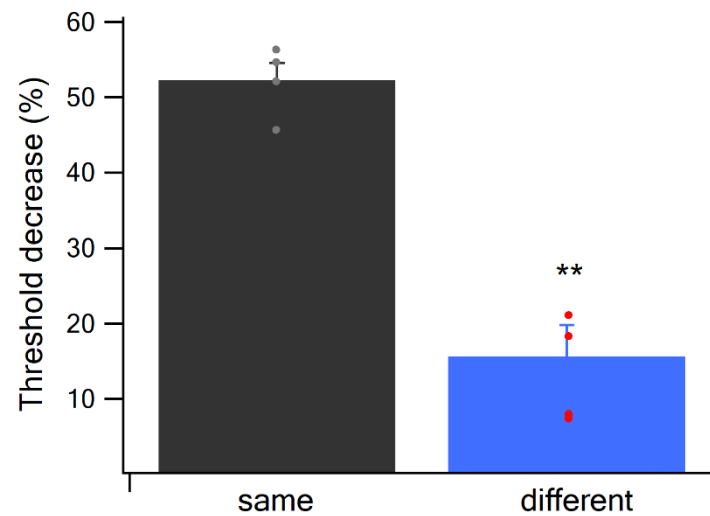

c

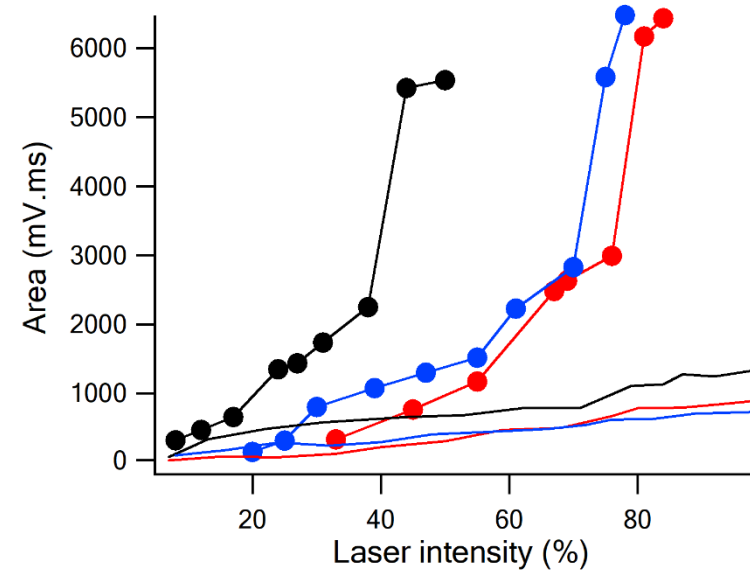

Supplement: supp [file elife-38446-supp-v1.zip]

**a**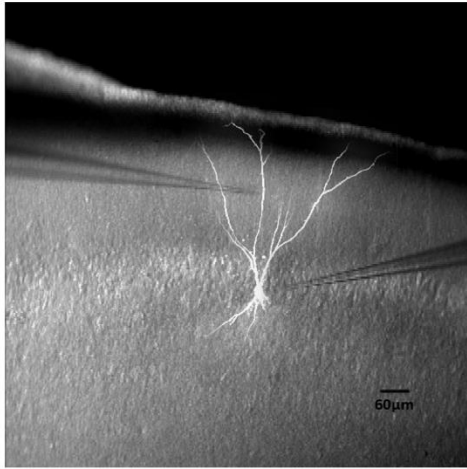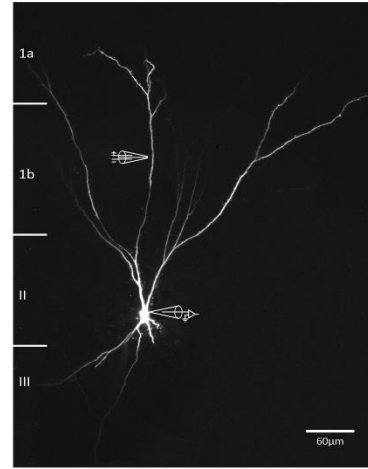**b**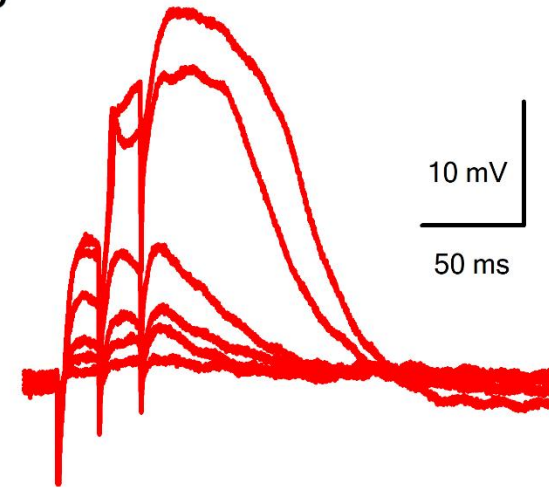**c**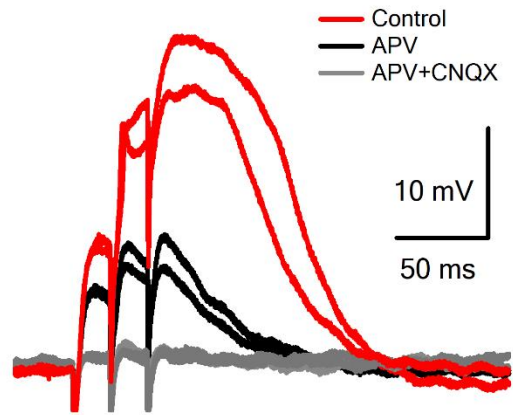**d**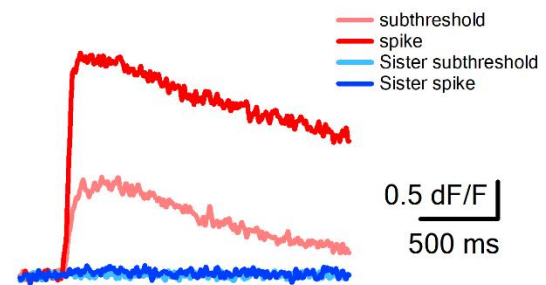**e**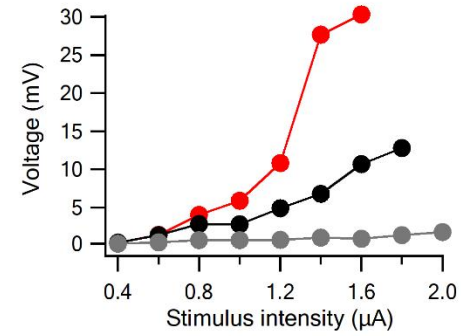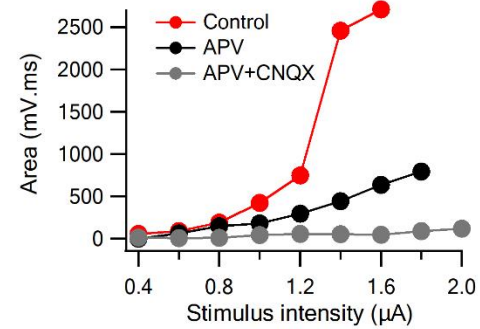**f**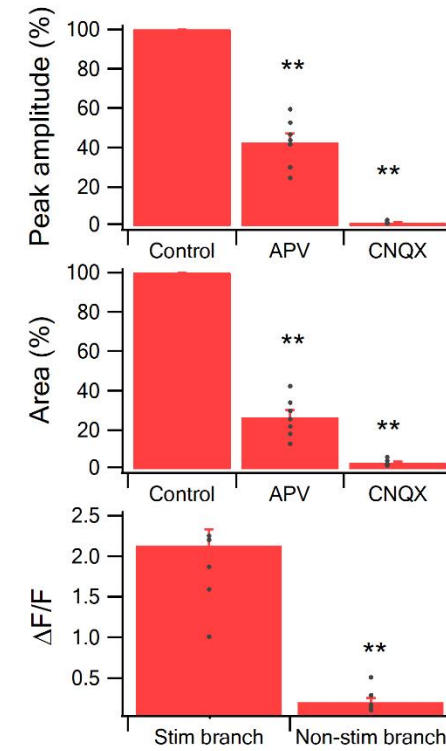

Supplement: supp [file elife-38446-supp-v1.zip]

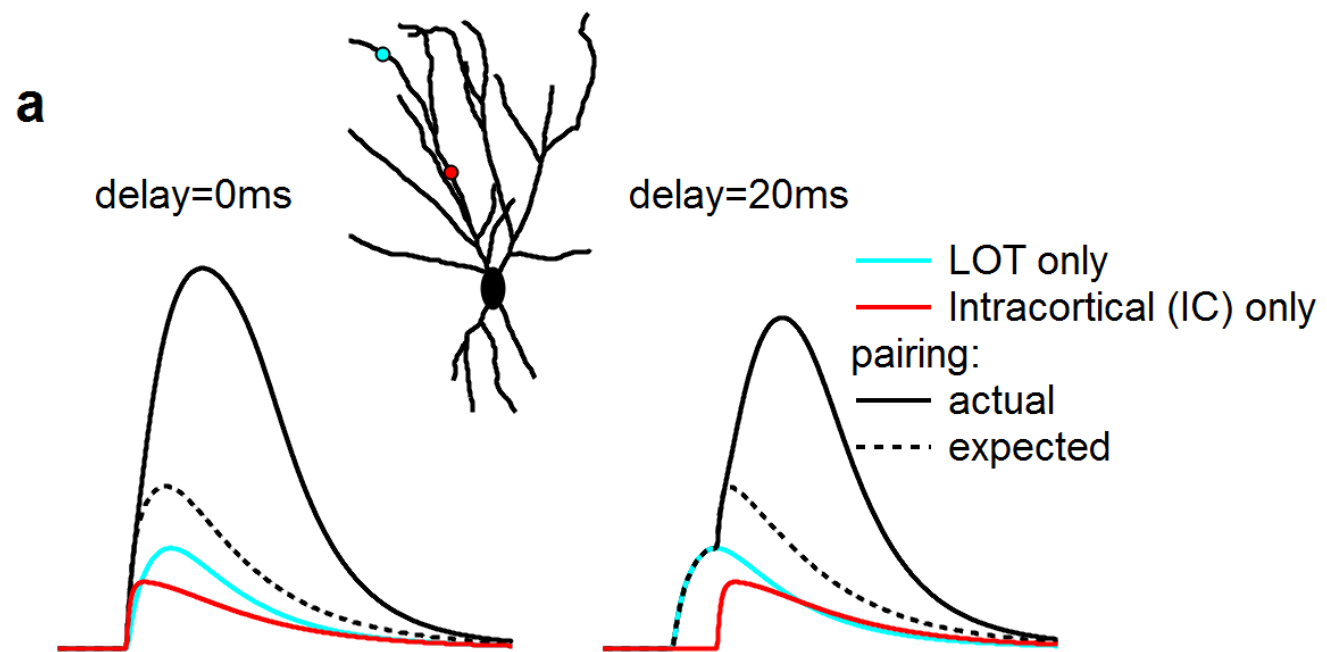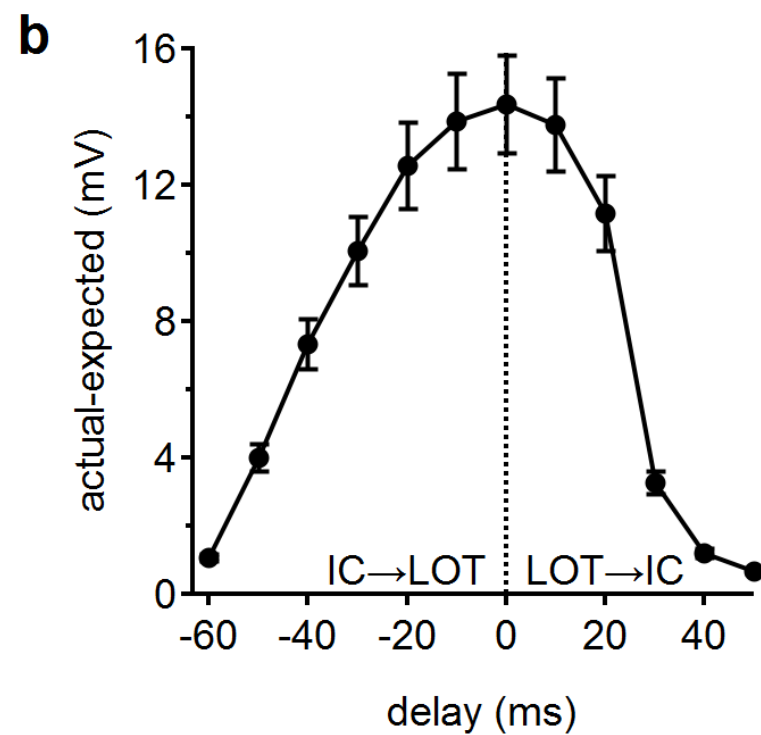

Supplement: supp [file elife-38446-supp-v1.zip]

**a**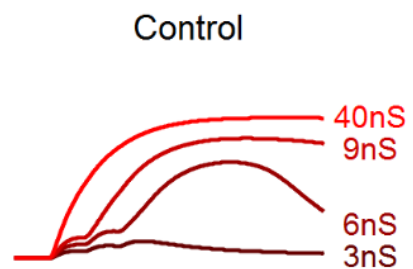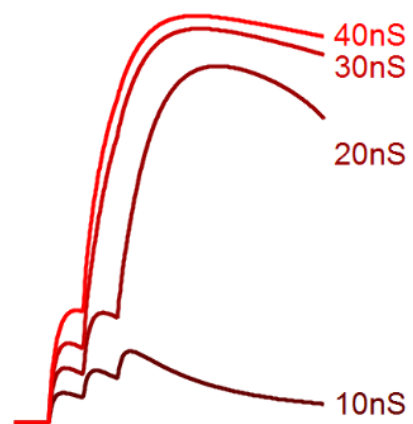**b**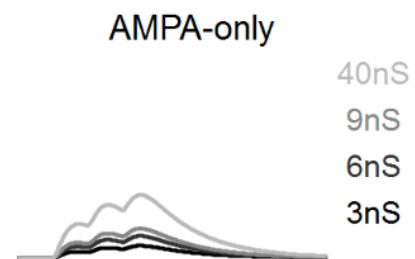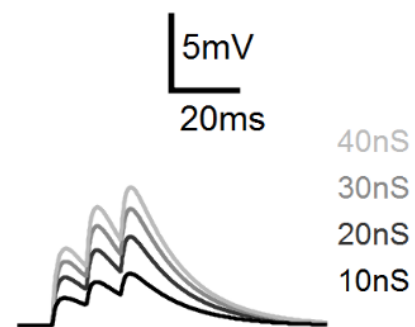**c**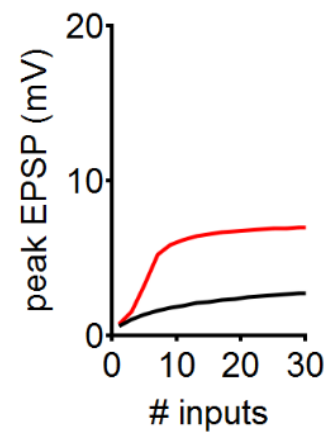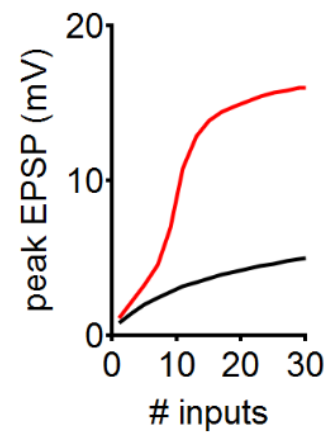**D**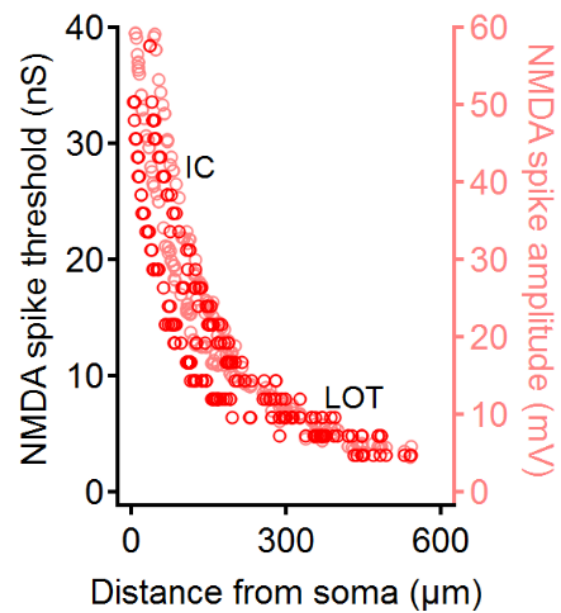

Supplement: supp [file elife-38446-supp-v1.zip]
